# Supplementary material for: Which Risk Factors and Colposcopic Patterns Are Predictive for High-Grade VAIN? A Retrospective Analysis
Source: MDPI journal article supplement (doi:10.3390/diagnostics13020176), 2023-01-04
Supplement: s1 [file s1]

## Supplementary Tables

**Table S1.** Patients' colposcopic features summary statistics<sup>a</sup> by VAIN grade at diagnosis.

| Characteristic       |              | All patients<br>N = 245 | VAIN Grade       |                  |                                | p-value |
|----------------------|--------------|-------------------------|------------------|------------------|--------------------------------|---------|
|                      |              |                         | VAIN 1<br>N = 52 | VAIN 2<br>N = 55 | VAIN 3 <sup>b</sup><br>N = 138 |         |
| Grade                | G1           | 134 (55.6)              | 45 (88.2)        | 41 (74.6)        | 48 (35.6)                      | < 0.001 |
|                      | G2           | 107 (44.4)              | 6 (11.8)         | 14 (25.4)        | 87 (64.4)                      |         |
| Lesion type          | Flat         | 145 (61.4)              | 41 (80.4)        | 38 (70.4)        | 66 (50.4)                      | < 0.001 |
|                      | Papillary    | 91 (38.6)               | 10 (19.6)        | 16 (29.6)        | 65 (49.6)                      |         |
| Multifocality        | Unifocal     | 139 (57.9)              | 34 (65.4)        | 29 (53.7)        | 76 (56.7)                      | 0.44    |
|                      | Multifocal   | 101 (42.1)              | 18 (34.6)        | 25 (46.3)        | 58 (43.3)                      |         |
| Vascularity          | No           | 191 (81.3)              | 51 (98.1)        | 51 (92.7)        | 89 (69.5)                      | < 0.001 |
|                      | Yes          | 44 (18.7)               | 1 (1.9)          | 4 (7.3)          | 39 (30.5)                      |         |
| Vaginal localization | Vault        | 94 (38.7)               | 15 (28.9)        | 21 (38.2)        | 58 (42.7)                      | 0.13    |
|                      | Upper third  | 109 (44.9)              | 24 (46.2)        | 24 (43.6)        | 61 (44.9)                      |         |
|                      | Middle third | 26 (10.7)               | 10 (19.2)        | 8 (14.6)         | 8 (5.9)                        |         |
|                      | Lower third  | 14 (5.8)                | 3 (5.8)          | 2 (3.6)          | 9 (6.6)                        |         |

<sup>a</sup> N (column %); <sup>b</sup> Excluding N = 10 VAIN3 with stromal microinvasion; VAIN = Vaginal Intraepithelial Neoplasia.

**Table S2.** Missing data distribution<sup>a</sup> by VAIN grade at diagnosis.

| Characteristic        | VAIN                    |           |           |                     |             | p-value |
|-----------------------|-------------------------|-----------|-----------|---------------------|-------------|---------|
|                       | All patients<br>N = 255 | VAIN 1    | VAIN 2    | VAIN 3 <sup>b</sup> |             |         |
|                       |                         | N = 52    | N = 55    | N = 148             |             |         |
| Current/former smoker | 3 (1.2)                 | 0         | 2 (3.6)   | 1 (0.7)             | 0.23        |         |
| Parity                | 22 (8.6)                | 3 (5.8)   | 10 (18.2) | 9 (6.1)             | <b>0.03</b> |         |
| Immunosuppression     | 2 (0.8)                 | 0         | 0         | 2 (1.4)             | 1.00        |         |
| Previous cancer       | 2 (0.8)                 | 1 (1.9)   | 0         | 1 (0.7)             | 0.41        |         |
| Previous CIN          | 2 (0.8)                 | 0         | 0         | 2 (1.4)             | 1.00        |         |
| Previous VIN          | 2 (0.8)                 | 1 (1.9)   | 0         | 1 (0.7)             | 0.41        |         |
| Previous AIN          | 2 (0.8)                 | 1 (1.9)   | 0         | 1 (0.7)             | 0.41        |         |
| Concomitant AIN       | 1 (0.4)                 | 0         | 1 (1.8)   | 0                   | 0.42        |         |
| HR-HPV                | 95 (37.3)               | 16 (30.8) | 17 (30.9) | 62 (41.9)           | 0.21        |         |
| Cytology              | 26 (10.2)               | 3 (5.8)   | 5 (9.1)   | 18 (12.2)           | 0.45        |         |
| Vaginal localization  | 2 (0.8)                 | 0         | 0         | 2 (1.4)             | 1.00        |         |
| Grade                 | 4 (1.6)                 | 1 (1.9)   | 0         | 3 (2.0)             | 0.65        |         |
| Lesion type           | 10 (3.9)                | 1 (1.9)   | 1 (1.8)   | 8 (5.4)             | 0.49        |         |
| Multifocality         | 6 (2.4)                 | 0         | 1 (1.8)   | 5 (3.4)             | 0.63        |         |
| Vascularity           | 11 (4.3)                | 0         | 0         | 11 (7.4)            | <b>0.02</b> |         |

<sup>a</sup> N (column %); <sup>b</sup> Including N = 10 VAIN3 with stromal microinvasion; VAIN = Vaginal Intraepithelial Neoplasia; CIN = Cervical Intraepithelial Neoplasia; VIN = Vulvar Intraepithelial Neoplasia; AIN = Anal Intraepithelial Neoplasia; HR-HPV = High-risk Human Papillomavirus.

**Table S3.** Colposcopic Grade association with Lesion type and Vascularity.

|             |  | Colposcopic Grade, N (column %) |           | p-value |
|-------------|--|---------------------------------|-----------|---------|
|             |  | G1                              | G2        |         |
| Lesion type |  |                                 |           |         |
| Flat        |  | 118 (89.4)                      | 27 (24.6) | < 0.001 |
| Papillary   |  | 14 (10.6)                       | 83 (75.5) |         |
| Vascularity |  |                                 |           |         |
| No          |  | 129 (97.0)                      | 65 (60.2) | < 0.001 |
| Yes         |  | 4 (3.0)                         | 43 (39.8) |         |
